# Supplementary material for: Evaluation of Sustainable Recycled Products to Increase the Production of Nutraceutical and Antibacterial Molecules in Basil Plants by a Combined Metabolomic Approach
Source: MDPI journal article supplement (doi:10.3390/plants12030513), 2023-01-23

# Evaluation of sustainable recycled products to increase the production of nutraceutical molecules in basil plants by combined metabolomic approach

Mariavittoria Verrillo<sup>1,2</sup>, Gunda Koellensperger<sup>3,4</sup>, Marlene Puehringer<sup>3,4</sup>, Alessandro Piccolo<sup>1,2</sup>,  
Vincenza Cozzolino<sup>1,2</sup>, Riccardo Spaccini<sup>1,2</sup>✧\*, Evelyn Rampler<sup>3,4</sup>✧\*

1. Dipartimento di Agraria, Università di Napoli Federico II, Via Università 100, 80055 Portici, Italy
2. Centro Interdipartimentale di Ricerca per la Risonanza Magnetica Nucleare per l'Ambiente, l'Agroalimentare, ed i Nuovi Materiali (CERMANU), Università di Napoli Federico II, Via Università 100, 80055 Portici, Italy
3. Department of Analytical Chemistry, Faculty of Chemistry, University of Vienna, Waehringer Strasse 38, Vienna, 1090, Austria
4. Vienna Metabolomics Center (VIME), University of Vienna, Althanstrasse 14, Vienna, 1090, Austria

\*Corresponding authors: Evelyn Rampler, phone: +43-1-4277-52381, [evelyn.rampler@univie.ac.at](mailto:evelyn.rampler@univie.ac.at); ORCID: <https://orcid.org/0000-0002-9429-7663>; Riccardo Spaccini: phone +39 0812539176, [riccardo.spaccini@unina.it](mailto:riccardo.spaccini@unina.it), ORCID <https://orcid.org/0000-0002-9828-1992>

✧ These authors contributed equally to this work

**Table S1:** Composition of multi-metabolite standard for metabolomics analysis.

|    | Compound Name                      | m/z       | Adduct | Charge |
|----|------------------------------------|-----------|--------|--------|
| 1  | 1-Methylhydantoin                  | 113.03565 | M-H    | -1     |
| 2  | 1-Methylnicotinamide               | 135.05639 | M-H    | -1     |
| 3  | 2'-Deoxyuridine                    | 227.06734 | M-H    | -1     |
| 4  | 2-(Carbamoylamino)butanedioic acid | 175.03604 | M-H    | -1     |
| 5  | 2-Deoxycytidine                    | 226.08333 | M-H    | -1     |
| 6  | 3-Methyl-2-oxovaleric acid         | 129.05572 | M-H    | -1     |
| 7  | 3-Methylcytidine                   | 256.09389 | M-H    | -1     |
| 8  | 3-Phosphoglycerate                 | 184.98566 | M-H    | -1     |
| 9  | 3AMP                               | 346.05581 | M-H    | -1     |
| 10 | 4-Hydroxy-proline                  | 130.05097 | M-H    | -1     |
| 11 | 5'-Deoxy-5'-Methylthioadenosine    | 296.08228 | M-H    | -1     |
| 12 | 5-Methyluridine                    | 257.07791 | M-H    | -1     |
| 13 | 6-Phosphogluconate                 | 275.01736 | M-H    | -1     |
| 14 | Adenine                            | 134.04722 | M-H    | -1     |
| 15 | Adenosine                          | 266.08948 | M-H    | -1     |
| 16 | ADP                                | 426.02214 | M-H    | -1     |
| 17 | Alanine                            | 88.0404   | M-H    | -1     |
| 18 | alpha-Aminoadipic acid             | 160.06153 | M-H    | -1     |
| 19 | alpha-Ketoglutarate                | 145.01425 | M-H    | -1     |
| 20 | AMP                                | 346.05581 | M-H    | -1     |
| 21 | Arginine                           | 173.1044  | M-H    | -1     |
| 22 | Argininosuccinic acid              | 289.11536 | M-H    | -1     |
| 23 | Asparagine                         | 131.04622 | M-H    | -1     |
| 24 | Aspartate                          | 132.03023 | M-H    | -1     |
| 25 | ATP                                | 505.98847 | M-H    | -1     |
| 26 | Betaine                            | 116.0717  | M-H    | -1     |
| 27 | Biotin                             | 243.08089 | M-H    | -1     |
| 28 | cAMP                               | 328.04524 | M-H    | -1     |
| 29 | Carnitine                          | 160.09792 | M-H    | -1     |
| 30 | cGMP                               | 344.04016 | M-H    | -1     |
| 31 | Choline chloride                   | 102.09244 | M-H    | -1     |
| 32 | cis-Aconitate                      | 173.00916 | M-H    | -1     |
| 33 | Citrate                            | 191.01973 | M-H    | -1     |
| 34 | Citrulline                         | 174.08841 | M-H    | -1     |
| 35 | CMP                                | 322.04457 | M-H    | -1     |
| 36 | CTP                                | 481.97723 | M-H    | -1     |
| 37 | Cystathionine                      | 221.06015 | M-H    | -1     |
| 38 | Cysteic acid                       | 167.99722 | M-H    | -1     |

|    |                           |           |     |    |
|----|---------------------------|-----------|-----|----|
| 39 | Cysteine                  | 120.01247 | M-H | -1 |
| 40 | Cysteinyl-glycine         | 177.03394 | M-H | -1 |
| 41 | Cystine                   | 239.01657 | M-H | -1 |
| 42 | Cytidine                  | 242.07824 | M-H | -1 |
| 43 | Cytosine                  | 110.03599 | M-H | -1 |
| 44 | dAMP                      | 330.06089 | M-H | -1 |
| 45 | dATP                      | 489.99355 | M-H | -1 |
| 46 | dCMP                      | 306.04966 | M-H | -1 |
| 47 | dCTP                      | 465.98232 | M-H | -1 |
| 48 | dGTP                      | 505.98847 | M-H | -1 |
| 49 | Dihydroxyacetonephosphate | 168.99075 | M-H | -1 |
| 50 | Dihydroxyisovalerate      | 133.05063 | M-H | -1 |
| 51 | Erythrol                  | 121.05063 | M-H | -1 |
| 52 | Erythrose-4-phosphate     | 199.00131 | M-H | -1 |
| 53 | Flavinadenin dinucleotide | 784.14986 | M-H | -1 |
| 54 | Fructose                  | 179.05611 | M-H | -1 |
| 55 | Fructose-1,6-bisphosphate | 338.98877 | M-H | -1 |
| 56 | Fructose-6-phosphate      | 259.02244 | M-H | -1 |
| 57 | Fumarate                  | 115.00368 | M-H | -1 |
| 58 | Galactose                 | 179.05611 | M-H | -1 |
| 59 | GDP                       | 442.01705 | M-H | -1 |
| 60 | Gluconate                 | 195.05103 | M-H | -1 |
| 61 | Glucose                   | 179.05611 | M-H | -1 |
| 62 | Glucose-1-phosphate       | 259.02244 | M-H | -1 |
| 63 | Glucose-6-phosphate       | 259.02244 | M-H | -1 |
| 64 | Glutamate                 | 146.04588 | M-H | -1 |
| 65 | Glutamine                 | 145.06187 | M-H | -1 |
| 66 | Glutamyl-cysteine         | 249.05507 | M-H | -1 |
| 67 | Glutathione, oxidized     | 611.14468 | M-H | -1 |
| 68 | Glutathione, reduced      | 306.07653 | M-H | -1 |
| 69 | Glycine                   | 74.02475  | M-H | -1 |
| 70 | Glyoxylic acid            | 72.99312  | M-H | -1 |
| 71 | GMP                       | 362.05072 | M-H | -1 |
| 72 | GTP                       | 521.98338 | M-H | -1 |
| 73 | Guanidineacetic acid      | 116.04655 | M-H | -1 |
| 74 | Guanine                   | 150.04213 | M-H | -1 |
| 75 | Guanosine                 | 282.08439 | M-H | -1 |
| 76 | Histidine                 | 154.0622  | M-H | -1 |
| 77 | Homocysteine              | 134.02812 | M-H | -1 |
| 78 | Homoserine                | 118.05097 | M-H | -1 |
| 79 | Hydroxyglutaric acid      | 147.0299  | M-H | -1 |
| 80 | IMP                       | 347.03982 | M-H | -1 |
| 81 | Inosine                   | 267.07349 | M-H | -1 |
| 82 | Inositol                  | 179.05611 | M-H | -1 |
| 83 | Isocitrate                | 191.01973 | M-H | -1 |
| 84 | Isoguanosine              | 282.08439 | M-H | -1 |

|     |                           |           |     |    |
|-----|---------------------------|-----------|-----|----|
| 85  | Isoleucine                | 130.08735 | M-H | -1 |
| 86  | Ketoisovalerate           | 115.04007 | M-H | -1 |
| 87  | Kynurenine                | 207.07752 | M-H | -1 |
| 88  | Lactate                   | 89.02442  | M-H | -1 |
| 89  | Leucine                   | 130.08735 | M-H | -1 |
| 90  | Lysine                    | 145.09825 | M-H | -1 |
| 91  | Malate                    | 133.01425 | M-H | -1 |
| 92  | Mannitol                  | 181.07176 | M-H | -1 |
| 93  | Mannitol 1-phosphate      | 261.03809 | M-H | -1 |
| 94  | Mannose                   | 179.05611 | M-H | -1 |
| 95  | Melatonin                 | 231.1139  | M-H | -1 |
| 96  | Methionine                | 148.04377 | M-H | -1 |
| 97  | Methionine sulfone        | 180.0336  | M-H | -1 |
| 98  | Mevalonic acid            | 147.06628 | M-H | -1 |
| 99  | N-Acetyl-Asp-Glu          | 303.08339 | M-H | -1 |
| 100 | N-Acetyl-L-aspartic acid  | 174.0408  | M-H | -1 |
| 101 | N-Acetyl-serine           | 146.04588 | M-H | -1 |
| 102 | N4-Acetylcytidine         | 284.08881 | M-H | -1 |
| 103 | NAD+                      | 662.10184 | M-H | -1 |
| 104 | NADH                      | 664.11749 | M-H | -1 |
| 105 | NADP+                     | 742.06817 | M-H | -1 |
| 106 | NADPH                     | 744.08382 | M-H | -1 |
| 107 | Nicotinamide              | 121.04074 | M-H | -1 |
| 108 | Octopamine                | 152.0717  | M-H | -1 |
| 109 | Ornithine                 | 131.0826  | M-H | -1 |
| 110 | Oxaloacetic acid          | 130.9986  | M-H | -1 |
| 111 | Palmitic acid             | 255.23295 | M-H | -1 |
| 112 | Phenylalanine             | 164.0717  | M-H | -1 |
| 113 | Phosphocreatine           | 210.02853 | M-H | -1 |
| 114 | Proline                   | 114.05605 | M-H | -1 |
| 115 | Propionyl-L-carnitine     | 216.12413 | M-H | -1 |
| 116 | Pseudouridine             | 243.06226 | M-H | -1 |
| 117 | Pyruvate                  | 87.00877  | M-H | -1 |
| 118 | Ribose                    | 149.04555 | M-H | -1 |
| 119 | Ribose-5-phosphate        | 229.01188 | M-H | -1 |
| 120 | Ribulose-5-phosphate      | 229.01188 | M-H | -1 |
| 121 | S-(Adenosyl)-methionine   | 397.12996 | M-H | -1 |
| 122 | S-Adenosyl-homocysteine   | 383.11431 | M-H | -1 |
| 123 | Sarcosine                 | 88.0404   | M-H | -1 |
| 124 | Sedoheptulose-7-phosphate | 289.03301 | M-H | -1 |
| 125 | Seleno-methionine         | 195.98822 | M-H | -1 |
| 126 | Serine                    | 104.03532 | M-H | -1 |
| 127 | Serotonine                | 175.08769 | M-H | -1 |
| 128 | Spermidine                | 144.15062 | M-H | -1 |
| 129 | Spermine                  | 201.20847 | M-H | -1 |
| 130 | Succinate                 | 117.01933 | M-H | -1 |

|     |                                  |           |     |    |
|-----|----------------------------------|-----------|-----|----|
| 131 | Thiamine                         | 264.10503 | M-H | -1 |
| 132 | Threonine                        | 118.05097 | M-H | -1 |
| 133 | Thymidine                        | 241.08299 | M-H | -1 |
| 134 | Thymine                          | 125.03565 | M-H | -1 |
| 135 | TMP                              | 321.04933 | M-H | -1 |
| 136 | Trehalose                        | 341.10893 | M-H | -1 |
| 137 | Tryptophan                       | 203.0826  | M-H | -1 |
| 138 | TTP                              | 480.98199 | M-H | -1 |
| 139 | Tyrosine                         | 180.06662 | M-H | -1 |
| 140 | Methylhydantoin                  | 117.04907 | M-H | -1 |
| 141 | Methylnicotinamide               | 142.07987 | M-H | -1 |
| 142 | Deoxyuridine                     | 236.09754 | M-H | -1 |
| 143 | (Carbamoylamino)butanedioic acid | 180.05282 | M-H | -1 |
| 144 | Deoxycytidine                    | 235.11352 | M-H | -1 |
| 145 | 3-Methyl-2-oxovaleric acid       | 135.07585 | M-H | -1 |
| 146 | Methylcytidine                   | 266.12744 | M-H | -1 |
| 147 | 3-Phosphoglycerate               | 187.99573 | M-H | -1 |
| 148 | AMP                              | 356.08936 | M-H | -1 |
| 149 | 4-Hydroxy-proline                | 135.06774 | M-H | -1 |
| 150 | 5'-Deoxy-5'-Methylthioadenosine  | 307.11919 | M-H | -1 |
| 151 | Methyluridine                    | 267.11146 | M-H | -1 |
| 152 | Phosphogluconate                 | 281.03749 | M-H | -1 |
| 153 | Adenine                          | 139.06399 | M-H | -1 |
| 154 | Adenosine                        | 276.12303 | M-H | -1 |
| 155 | ADP                              | 436.05569 | M-H | -1 |
| 156 | Alanine                          | 91.05047  | M-H | -1 |
| 157 | alpha-Aminoadipic acid           | 166.08166 | M-H | -1 |
| 158 | alpha-Ketoglutarate              | 150.03102 | M-H | -1 |
| 159 | Arginine                         | 179.12453 | M-H | -1 |
| 160 | Argininosuccinic acid            | 299.14891 | M-H | -1 |
| 161 | Asparagine                       | 135.05963 | M-H | -1 |
| 162 | Aspartate                        | 136.04365 | M-H | -1 |
| 163 | ATP                              | 516.02202 | M-H | -1 |
| 164 | Betaine                          | 121.08848 | M-H | -1 |
| 165 | Biotin                           | 253.11443 | M-H | -1 |
| 166 | cAMP                             | 338.07879 | M-H | -1 |
| 167 | Carnitine                        | 167.1214  | M-H | -1 |
| 168 | cGMP                             | 354.07371 | M-H | -1 |
| 169 | Choline chloride                 | 107.10921 | M-H | -1 |
| 170 | cis-Aconitate                    | 179.02929 | M-H | -1 |
| 171 | Citrate                          | 197.03985 | M-H | -1 |
| 172 | Citrulline                       | 180.10854 | M-H | -1 |
| 173 | CMP                              | 331.07477 | M-H | -1 |
| 174 | CTP                              | 491.00743 | M-H | -1 |
| 175 | Cystathionine                    | 228.08363 | M-H | -1 |
| 176 | Cysteic acid                     | 171.00728 | M-H | -1 |

|     |                           |           |     |    |
|-----|---------------------------|-----------|-----|----|
| 177 | Cysteine                  | 123.02254 | M-H | -1 |
| 178 | Cysteinyl-glycine         | 182.05071 | M-H | -1 |
| 179 | Cystine                   | 245.0367  | M-H | -1 |
| 180 | Cytidine                  | 251.10844 | M-H | -1 |
| 181 | Cytosine                  | 114.0494  | M-H | -1 |
| 182 | dAMP                      | 340.09444 | M-H | -1 |
| 183 | dATP                      | 500.0271  | M-H | -1 |
| 184 | dCMP                      | 315.07985 | M-H | -1 |
| 185 | dCTP                      | 475.01251 | M-H | -1 |
| 186 | dGTP                      | 516.02202 | M-H | -1 |
| 187 | Dihydroxyacetonephosphate | 172.00081 | M-H | -1 |
| 188 | Dihydroxyisovalerate      | 138.06741 | M-H | -1 |
| 189 | Erythrol                  | 125.06405 | M-H | -1 |
| 190 | Erythrose-4-phosphate     | 203.01473 | M-H | -1 |
| 191 | Flavinadenin dinucleotide | 811.24044 | M-H | -1 |
| 192 | Fructose                  | 185.07624 | M-H | -1 |
| 193 | Fructose-1,6-bisphosphate | 345.0089  | M-H | -1 |
| 194 | Fructose-6-phosphate      | 265.04257 | M-H | -1 |
| 195 | Fumarate                  | 119.0171  | M-H | -1 |
| 196 | Galactose                 | 185.07624 | M-H | -1 |
| 197 | GDP                       | 452.0506  | M-H | -1 |
| 198 | Gluconate                 | 201.07115 | M-H | -1 |
| 199 | Glucose                   | 185.07624 | M-H | -1 |
| 200 | Glucose-1-phosphate       | 265.04257 | M-H | -1 |
| 201 | Glucose-6-phosphate       | 265.04257 | M-H | -1 |
| 202 | Glutamate                 | 151.06266 | M-H | -1 |
| 203 | Glutamine                 | 150.07864 | M-H | -1 |
| 204 | Glutamyl-cysteine         | 257.0819  | M-H | -1 |
| 205 | Glutathione, oxidized     | 631.21178 | M-H | -1 |
| 206 | Glutathione, reduced      | 316.11008 | M-H | -1 |
| 207 | Glycine                   | 76.03146  | M-H | -1 |
| 208 | Glyoxylic acid            | 74.99983  | M-H | -1 |
| 209 | GMP                       | 372.08427 | M-H | -1 |
| 210 | GTP                       | 532.01693 | M-H | -1 |
| 211 | Guanidineacetic acid      | 119.05661 | M-H | -1 |
| 212 | Guanine                   | 155.05891 | M-H | -1 |
| 213 | Guanosine                 | 292.11794 | M-H | -1 |
| 214 | Histidine                 | 160.08233 | M-H | -1 |
| 215 | Homocysteine              | 138.04154 | M-H | -1 |
| 216 | Homoserine                | 122.06439 | M-H | -1 |
| 217 | Hydroxyglutaric acid      | 152.04667 | M-H | -1 |
| 218 | IMP                       | 357.07337 | M-H | -1 |
| 219 | Inosine                   | 277.10704 | M-H | -1 |
| 220 | Inositol                  | 185.07624 | M-H | -1 |
| 221 | Isocitrate                | 197.03985 | M-H | -1 |
| 222 | Isoguanosine              | 292.11794 | M-H | -1 |

|     |                            |           |     |    |
|-----|----------------------------|-----------|-----|----|
| 223 | Isoleucine                 | 136.10748 | M-H | -1 |
| 224 | Ketoisovalerate            | 120.05684 | M-H | -1 |
| 225 | Kynurenine                 | 217.11106 | M-H | -1 |
| 226 | Lactate                    | 92.03448  | M-H | -1 |
| 227 | Leucine                    | 136.10748 | M-H | -1 |
| 228 | Lysine                     | 151.11838 | M-H | -1 |
| 229 | Malate                     | 137.02767 | M-H | -1 |
| 230 | Mannitol                   | 187.09189 | M-H | -1 |
| 231 | Mannitol 1-phosphate       | 267.05822 | M-H | -1 |
| 232 | Mannose                    | 185.07624 | M-H | -1 |
| 233 | Melatonin                  | 244.15751 | M-H | -1 |
| 234 | Methionine                 | 153.06055 | M-H | -1 |
| 235 | Methionine sulfone         | 185.05038 | M-H | -1 |
| 236 | Mevalonic acid             | 153.08641 | M-H | -1 |
| 237 | N-Acetyl-Asp-Glu           | 314.12029 | M-H | -1 |
| 238 | N-Acetyl-L-aspartic acid   | 180.06092 | M-H | -1 |
| 239 | N-Acetyl-serine            | 151.06266 | M-H | -1 |
| 240 | N4-Acetylcytidine          | 295.12571 | M-H | -1 |
| 241 | NAD+                       | 683.1723  | M-H | -1 |
| 242 | NADH                       | 685.18795 | M-H | -1 |
| 243 | NADP+                      | 763.13863 | M-H | -1 |
| 244 | NADPH                      | 765.15428 | M-H | -1 |
| 245 | Nicotinamide               | 127.06086 | M-H | -1 |
| 246 | Octopamine                 | 160.09854 | M-H | -1 |
| 247 | Ornithine                  | 136.09937 | M-H | -1 |
| 248 | Oxaloacetic acid           | 135.01202 | M-H | -1 |
| 249 | Palmitic acid              | 271.28663 | M-H | -1 |
| 250 | Phenylalanine              | 173.1019  | M-H | -1 |
| 251 | 2-phosphoenolpyruvate, PEP | 167.042   | M-H | -1 |
| 252 | Phosphocreatine            | 214.04195 | M-H | -1 |
| 253 | Proline                    | 119.07283 | M-H | -1 |
| 254 | Propionyl-L-carnitine      | 226.15768 | M-H | -1 |
| 255 | Pseudouridine              | 252.09245 | M-H | -1 |
| 256 | Pyruvate                   | 90.01883  | M-H | -1 |
| 257 | Ribose                     | 154.06232 | M-H | -1 |
| 258 | Ribose-5-phosphate         | 234.02865 | M-H | -1 |
| 259 | Ribulose-5-phosphate       | 234.02865 | M-H | -1 |
| 260 | S-(Adenosyl)-methionine    | 412.18028 | M-H | -1 |
| 261 | S-Adenosyl-homocysteine    | 397.16128 | M-H | -1 |
| 262 | Sarcosine                  | 91.05047  | M-H | -1 |
| 263 | Sedoheptulose-7-phosphate  | 296.05649 | M-H | -1 |
| 264 | Seleno-methionine          | 201.005   | M-H | -1 |
| 265 | Serine                     | 107.04538 | M-H | -1 |
| 266 | Serotonine                 | 185.12123 | M-H | -1 |
| 267 | Spermidine                 | 151.1741  | M-H | -1 |
| 268 | Spermine                   | 211.24202 | M-H | -1 |

|     |                        |            |     |    |
|-----|------------------------|------------|-----|----|
| 269 | Succinate              | 121.03275  | M-H | -1 |
| 270 | Thiamine               | 276.14529  | M-H | -1 |
| 271 | Threonine              | 122.06439  | M-H | -1 |
| 272 | Thymidine              | 251.11654  | M-H | -1 |
| 273 | Thymine                | 130.05242  | M-H | -1 |
| 274 | TMP                    | 331.08287  | M-H | -1 |
| 275 | Trehalose              | 353.14919  | M-H | -1 |
| 276 | Tryptophan             | 214.1195   | M-H | -1 |
| 277 | TTP                    | 491.01553  | M-H | -1 |
| 278 | Tyrosine               | 189.09681  | M-H | -1 |
| 279 | UDP                    | 412.02511  | M-H | -1 |
| 280 | UMP                    | 332.05878  | M-H | -1 |
| 281 | Uracil                 | 115.03342  | M-H | -1 |
| 282 | Urea                   | 60.02844   | M-H | -1 |
| 283 | Uridine                | 252.09245  | M-H | -1 |
| 284 | UTP                    | 491.99144  | M-H | -1 |
| 285 | Valine                 | 121.08848  | M-H | -1 |
| 286 | Xanthine               | 156.04292  | M-H | -1 |
| 287 | Xylose                 | 154.06232  | M-H | -1 |
| 288 | UDP                    | 402.99492  | M-H | -1 |
| 289 | UMP                    | 323.02859  | M-H | -1 |
| 290 | Uracil                 | 111.02     | M-H | -1 |
| 291 | Urea                   | 59.02509   | M-H | -1 |
| 292 | Uridine                | 243.06226  | M-H | -1 |
| 293 | UTP                    | 482.96125  | M-H | -1 |
| 294 | Valine                 | 116.0717   | M-H | -1 |
| 295 | Xanthine               | 151.02615  | M-H | -1 |
| 296 | Xylose                 | 149.04555  | M-H | -1 |
| 297 | Rosmarinic Acid        | 359.0845   | M-H | -1 |
| 298 | Caffeic acid           | 179.042252 | M-H | -1 |
| 299 | Epicatechin            | 289.079041 | M-H | -1 |
| 300 | Kaempferol             | 285.047729 | M-H | -1 |
| 301 | Salvianolic acid B     | 717.153381 | M-H | -1 |
| 302 | Trans Cinnamic Acid    | 149.052429 | M-H | -1 |
| 303 | Resveratrol            | 227.078644 | M-H | -1 |
| 304 | p-Coumaric acid        | 163.047348 | M-H | -1 |
| 305 | Tocopherol             | 429.381073 | M-H | -1 |
| 306 | 4-Hydroxy benzoic acid | 137.031693 | M-H | -1 |
| 307 | Chicoric Acid          | 473.079834 | M-H | -1 |
| 308 | Quercetin-glucoside    | 319.053223 | M-H | -1 |
| 309 | Naringenine            | 271.25     | M-H | -1 |

---



**Table S2:** Identification of primary and secondary metabolites from basil leaves by Liquid Chromatography High-Resolution Mass Spectrometry (LC-HRMS).

|    | <b>Metabolite</b>                         | <b>Molecular Formula</b> | <b>M.W.<sup>a</sup></b> | <b>R.T.<sup>a</sup></b> |
|----|-------------------------------------------|--------------------------|-------------------------|-------------------------|
| 1  | Arginine                                  | C6 H14 N4 O2             | 174.11145               | 1.599                   |
| 2  | $\alpha$ -Trehalose                       | C12 H22 O11              | 342.11597               | 1.621                   |
| 4  | Serine                                    | C3 H7 N O3               | 105.04243               | 1.626                   |
| 5  | Arginine                                  | C6 H14 N4 O2             | 174.11148               | 1.633                   |
| 6  | 5,5-Dimethylhydantoin                     | C5 H8 N2 O2              | 128.05845               | 1.666                   |
| 7  | Glutamine                                 | C5 H10 N2 O3             | 146.06899               | 1.666                   |
| 8  | Threonine                                 | C4 H9 N O3               | 119.05804               | 1.668                   |
| 9  | Aspartic acid                             | C4 H7 N O4               | 133.03737               | 1.669                   |
| 11 | Glutamic acid                             | C5 H9 N O4               | 147.053                 | 1.691                   |
| 12 | Glucose                                   | C6 H12 O6                | 226.06844               | 1.716                   |
| 13 | $\alpha$ -Lactose                         | C12 H22 O11              | 388.12125               | 1.729                   |
| 14 | Mannose                                   | C6 H12 O6                | 180.06319               | 1.732                   |
| 15 | Gluconic acid                             | C6 H12 O7                | 150.05233               | 1.74                    |
| 16 | Threonic acid                             | C4 H8 O5                 | 136.03706               | 1.796                   |
| 17 | 7-Methylxanthine                          | C6 H6 N4 O2              | 166.0475                | 1.824                   |
| 18 | N-Acetylorithine                          | C7 H14 N2 O3             | 174.10019               | 1.827                   |
| 19 | Quinic acid                               | C7 H12 O6                | 192.06329               | 1.832                   |
| 20 | 2,3-Dihydroxypropanoic acid               | C3 H6 O4                 | 106.0265                | 1.883                   |
| 21 | $\delta$ -Gluconic acid $\delta$ -lactone | C6 H10 O6                | 132.04214               | 1.942                   |
| 22 | 2,4-Dinitrophenol                         | C6 H4 N2 O5              | 184.01361               | 1.998                   |
| 23 | Purine                                    | C5 H4 N4                 | 120.04204               | 2.005                   |
| 24 | Quinic acid                               | C7 H12 O6                | 192.06313               | 2.008                   |
| 25 | Isocitric acid                            | C6 H8 O7                 | 146.02134               | 2.019                   |

|    |                             |                 |           |       |
|----|-----------------------------|-----------------|-----------|-------|
| 26 | Malic acid                  | C4 H6 O5        | 134.02135 | 2.036 |
| 27 | Fructose                    | C6 H12 O6       | 180.06319 | 2.085 |
| 28 | Tartaric acid               | C4 H6 O6        | 150.01622 | 2.092 |
| 29 | Fumaric acid                | C4 H4 O4        | 116.01082 | 2.177 |
| 30 | Uridine monophosphate (UMP) | C9 H13 N2 O9 P  | 324.0353  | 2.179 |
| 31 | Adenosine 5'-monophosphate  | C10 H14 N5 O7 P | 347.06244 | 2.211 |
| 32 | 2-Oxobutyric acid           | C4 H6 O3        | 102.03161 | 2.253 |
| 33 | Citric acid                 | C6 H8 O7        | 192.02682 | 2.413 |
| 34 | Pseudouridine               | C9 H12 N2 O6    | 244.06903 | 2.421 |
| 35 | 2-Oxoglutaric acid          | C5 H6 O5        | 146.0213  | 2.585 |
| 36 | 2-Furoic acid               | C5 H4 O3        | 112.01592 | 2.608 |
| 37 | Mesaconic acid              | C5 H6 O4        | 130.0264  | 2.609 |
| 38 | Uridine                     | C9 H12 N2 O6    | 244.06928 | 2.624 |
| 39 | 4-Oxoproline                | C5 H7 N O3      | 129.04251 | 2.64  |
| 40 | Adenosine                   | C10 H13 N5 O4   | 267.09655 | 2.668 |
| 41 | 2-Aminoadipic acid          | C6 H11 N O4     | 161.06869 | 2.675 |
| 42 | Tyrosine                    | C9 H11 N O3     | 181.07375 | 2.728 |
| 43 | N-Acetyl-DL-glutamic acid   | C7 H11 N O5     | 189.06355 | 2.761 |
| 44 | Endothal                    | C8 H10 O5       | 186.05261 | 2.773 |
| 45 | 3-Hydroxybutyric acid       | C4 H8 O3        | 104.04733 | 2.801 |
| 46 | Guanosine                   | C10 H13 N5 O5   | 283.09138 | 2.838 |
| 47 | Citraconic acid             | C5 H6 O4        | 130.02639 | 2.849 |
| 48 | cis-Aconitic acid           | C6 H6 O6        | 174.01617 | 2.859 |
| 49 | Leucine                     | C6 H13 N O2     | 131.09447 | 2.86  |
| 50 | δ-Ribono-1,4-lactone        | C5 H8 O5        | 148.03704 | 2.982 |
| 51 | Succinic acid               | C4 H6 O4        | 118.02647 | 3.038 |
| 52 | 4-Acetamidobutanoic acid    | C6 H11 N O3     | 145.07376 | 3.523 |
| 53 | N-Ethylglycine              | C4 H9 N O2      | 103.06328 | 3.53  |
| 54 | 4-Pyridoxic acid            | C8 H9 N O4      | 183.05306 | 3.551 |
| 55 | Propanoic acid              | C16 H22 O9      | 358.12629 | 3.605 |
| 56 | Catechol                    | C6 H6 O2        | 110.03665 | 3.755 |
| 57 | Xanthosine                  | C10 H12 N4 O6   | 284.07547 | 3.769 |

|    |                                |                 |           |       |
|----|--------------------------------|-----------------|-----------|-------|
| 58 | Gallic acid                    | C7 H6 O5        | 170.02144 | 4.183 |
| 59 | Itaconic acid                  | C5 H6 O4        | 130.02649 | 4.366 |
| 60 | N-Acetyl-4-aminosalicylic acid | C9 H9 N O4      | 195.05298 | 4.45  |
| 61 | 2-Aminooctanedioic acid        | C8 H15 N O4     | 189.10001 | 4.497 |
| 62 | Glutaric acid                  | C5 H8 O4        | 132.04211 | 4.554 |
| 63 | Galactose                      | C6 H12 O6       | 180.06323 | 4.625 |
| 64 | Pantothenic acid               | C9 H17 N O5     | 219.1105  | 4.639 |
| 65 | Phenylalanine                  | C9 H11 N O2     | 165.07885 | 4.882 |
| 66 | Pyrogallol                     | C6 H6 O3        | 126.03157 | 4.939 |
| 67 | Porphobilinogen                | C10 H14 N2 O4   | 226.09514 | 5.207 |
| 68 | Sorbic acid                    | C6 H8 O2        | 112.05237 | 5.215 |
| 69 | N-Acetylvaline                 | C7 H13 N O3     | 159.08938 | 5.219 |
| 70 | 3-Anisic acid                  | C8 H8 O3        | 152.04714 | 5.257 |
| 71 | Gentisic acid                  | C7 H6 O4        | 154.0264  | 5.258 |
| 72 | Methylsuccinic acid            | C5 H8 O4        | 132.04215 | 5.399 |
| 73 | Ethylmalonic acid              | C5 H8 O4        | 132.04211 | 5.4   |
| 74 | 2-Methylbenzoic acid           | C8 H8 O2        | 136.05233 | 5.424 |
| 75 | 4-Hydroxyphenylacetic acid     | C8 H8 O3        | 152.04717 | 5.424 |
| 76 | 6-Methoxysalicylic acid        | C8 H8 O4        | 168.04214 | 5.514 |
| 77 | Methyl salicylate              | C8 H8 O3        | 152.04713 | 5.525 |
| 78 | 4-Hydroxybenzylalcohol         | C7 H8 O2        | 124.05237 | 5.536 |
| 79 | Xanthurenic acid               | C10 H7 N O4     | 205.03731 | 5.614 |
| 80 | Benzoic acid                   | C7 H6 O2        | 122.03664 | 5.687 |
| 81 | Adenine                        | C5 H5 N5        | 135.0544  | 5.825 |
| 82 | 5'-S-Methyl-5'-thioadenosine   | C11 H15 N5 O3 S | 297.08929 | 5.826 |
| 83 | Adipic acid                    | C6 H10 O4       | 146.05777 | 6.024 |
| 84 | Tryptophan                     | C11 H12 N2 O2   | 204.08977 | 6.081 |
| 85 | 2,4-Dihydroxybenzoic acid      | C7 H6 O4        | 154.02647 | 6.095 |
| 86 | Caffeic acid                   | C9 H8 O4        | 134.03656 | 6.182 |
| 87 | Syringic acid                  | C9 H10 O5       | 198.0526  | 6.245 |
| 88 | Esculin                        | C15 H16 O9      | 340.07913 | 6.274 |
| 89 | Geniposide                     | C17 H24 O10     | 388.13684 | 6.321 |

|     |                                               |               |           |       |
|-----|-----------------------------------------------|---------------|-----------|-------|
| 90  | 4-Methylumbelliferone                         | C10 H8 O3     | 176.0471  | 6.357 |
| 91  | 4-Hydroxyphenyllactic acid                    | C9 H10 O4     | 182.0578  | 6.365 |
| 92  | N-Acetyl-L-methionine                         | C7 H13 N O3 S | 191.06143 | 6.367 |
| 93  | Mesalamine                                    | C7 H7 N O3    | 153.04228 | 6.603 |
| 94  | Kynurenic acid                                | C10 H7 N O3   | 189.04248 | 6.651 |
| 95  | Triethyl 4-phosphonocrotonate                 | C10 H19 O5 P  | 250.09683 | 6.716 |
| 96  | 2-Hydroxycinnamic acid                        | C9 H8 O3      | 164.04722 | 6.764 |
| 97  | Salicylic acid                                | C7 H6 O3      | 138.03154 | 7.072 |
| 98  | 2,5-Dihydroxybenzaldehyde                     | C7 H6 O3      | 138.03137 | 7.207 |
| 99  | Pimelic acid                                  | C7 H12 O4     | 160.07339 | 7.285 |
| 100 | Ferulic acid                                  | C10 H10 O4    | 194.05771 | 7.37  |
| 101 | Vanillic acid                                 | C8 H8 O4      | 168.04208 | 7.454 |
| 102 | Phenylglyoxylic acid                          | C8 H6 O3      | 150.03148 | 7.649 |
| 103 | Astragalin                                    | C21 H20 O11   | 448.10039 | 7.814 |
| 104 | Rutin                                         | C27 H30 O16   | 610.15302 | 8.027 |
| 105 | Cyclopentylacetic acid                        | C7 H12 O2     | 128.0836  | 8.086 |
| 106 | Lariciresinol 4-O-glucoside                   | C26 H34 O11   | 568.2154  | 8.249 |
| 107 | Quercetin-3 $\beta$ -D-glucoside              | C21 H20 O12   | 464.09515 | 8.392 |
| 108 | Eriodictyol                                   | C15 H12 O6    | 288.06325 | 8.406 |
| 109 | N-Acetyl-L-phenylalanine                      | C11 H13 N O3  | 207.08929 | 8.496 |
| 110 | Suberic acid                                  | C8 H14 O4     | 174.08899 | 8.541 |
| 111 | Dehydroacetic acid                            | C8 H8 O4      | 168.04205 | 8.908 |
| 112 | Vanillin                                      | C8 H8 O3      | 152.04714 | 8.989 |
| 113 | Afzelin                                       | C21 H20 O10   | 432.10545 | 9.085 |
| 114 | Corey lactone                                 | C8 H12 O4     | 172.07328 | 9.125 |
| 115 | N-Acetyl-DL-tryptophan                        | C13 H14 N2 O3 | 246.10018 | 9.187 |
| 116 | 3-O- $\beta$ -D-Glucopyranosylandrographolide | C26 H40 O10   | 558.26991 | 9.268 |
| 117 | Dodecanedioic acid                            | C12 H22 O4    | 230.15149 | 9.359 |
| 118 | 6-Hydroxycaproic acid                         | C6 H12 O3     | 132.07847 | 9.512 |
| 119 | Azelaic acid                                  | C9 H16 O4     | 188.10465 | 9.738 |
| 120 | 3-Phenyllactic acid                           | C9 H10 O3     | 120.0573  | 9.975 |
| 121 | trans-Cinnamic acid                           | C9 H8 O2      | 148.05227 | 9.975 |

|     |                                       |             |           |        |
|-----|---------------------------------------|-------------|-----------|--------|
| 122 | 4-Indolecarbaldehyde                  | C9 H7 N O   | 145.05259 | 10.029 |
| 123 | Isoferulic acid                       | C10 H10 O4  | 194.05764 | 10.375 |
| 124 | Eugenol                               | C10 H12 O2  | 164.08363 | 10.46  |
| 125 | 4-Acetamidobenzoic acid               | C9 H9 N O3  | 179.05801 | 10.845 |
| 126 | 4-Nitrophenol                         | C6 H5 N O3  | 139.02676 | 10.931 |
| 127 | Absciscic acid                        | C15 H20 O4  | 264.13598 | 10.974 |
| 128 | 2-Hydroxyphenylalanine                | C9 H11 N O3 | 181.07379 | 11.088 |
| 129 | Hydrocinnamic acid                    | C9 H10 O2   | 150.06786 | 11.657 |
| 130 | Genipin                               | C11 H14 O5  | 208.07338 | 11.661 |
| 131 | Genistein                             | C15 H10 O5  | 270.0526  | 12.017 |
| 132 | Naringenin                            | C15 H12 O5  | 272.0682  | 12.024 |
| 133 | Formononetin                          | C16 H12 O4  | 268.07336 | 12.054 |
| 134 | Hispidulin                            | C16 H12 O6  | 300.06317 | 12.215 |
| 135 | 3',5,7-Trihydroxy-4'-methoxyflavanone | C16 H14 O6  | 302.07883 | 12.231 |
| 136 | Trihydroxy-octadecenoic acid          | C18 H34 O5  | 330.24048 | 12.329 |
| 137 | Helvolic acid                         | C33 H44 O8  | 568.30693 | 12.35  |
| 138 | Jasmonic acid                         | C12 H18 O3  | 210.12539 | 12.354 |
| 139 | 4-Hydroxycoumarin                     | C9 H6 O3    | 162.03157 | 12.37  |
| 140 | 3-Hydroxyanthranilic acid             | C7 H7 N O3  | 153.04245 | 12.568 |
| 141 | Arjungenin                            | C30 H48 O6  | 504.34491 | 12.883 |
| 142 | Hydroxydodecanoic acid                | C12 H24 O3  | 216.172   | 13.449 |
| 143 | Hexadecanedioic acid                  | C16 H30 O4  | 286.21388 | 13.851 |
| 144 | Butylparaben                          | C11 H14 O3  | 194.0941  | 13.962 |
| 145 | 2,5-di-tert-Butylhydroquinone         | C14 H22 O2  | 222.16152 | 14.953 |
| 146 | Asiatic acid                          | C30 H48 O5  | 488.34983 | 15.825 |
| 147 | Hydroxyhexadecanoic acid              | C16 H32 O3  | 272.23501 | 17.717 |
| 148 | Abietic acid                          | C20 H30 O2  | 302.22436 | 18.161 |
| 149 | Ostruthin                             | C19 H22 O3  | 298.16003 | 24.186 |

a MW= molecular weight; RT= Retention time (minutes)

**Figure S1:** Total Ion Chromatogram (TIC) by Liquid Chromatography High Resolution Mass Spectrometry (LC/HRMS) of basil leaves extract (CTRL sample).

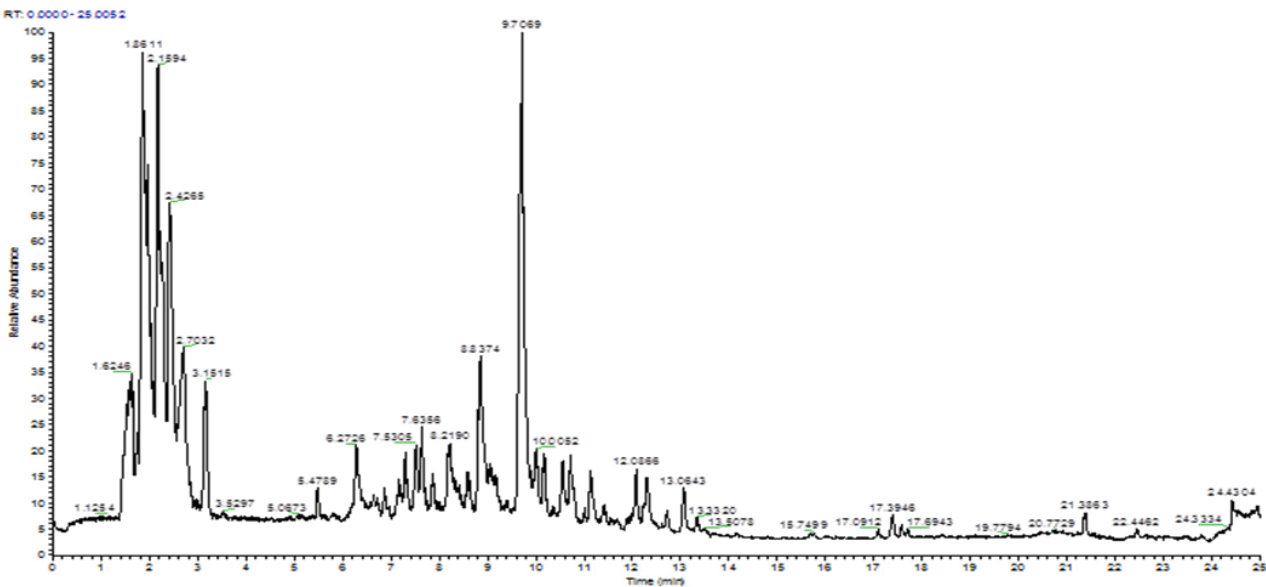

Supplement: s1 [file s1]
